# Supplementary material for: Is autumn the key for dengue epidemics in non endemic regions? The case of Argentina
Source: PeerJ. 2018 Jul 17;6:e5196. doi: 10.7717/peerj.5196 (PMC6054063; doi:10.7717/peerj.5196)
Supplement: File S1 — The Pearson’s correlation coefficient is informed. Values lower than |0.6| are dimmed in light gray. [file peerj-06-5196-s001.xlsx]

## Sheet: Hoja1
CORRELATION MATRICES
	TEMPORAL APPROACH - 2009-2016
		Virus pressure from endemic neighbouring countries and ENSO events
		DenBra	DenBol	DenPar	ApSe	JnDe	JlDe	JnJn
	DenBra	1	-0.66	0.82	0.75	0.80	0.68	0.64
	DenBol		1	-0.38	-0.43	-0.49	-0.35	-0.50
	DenPar			1	0.48	0.48	0.43	0.35
	ApSe				1	0.97	0.97	0.54
	JnDe					1	0.90	0.70
	JlDe						1	0.33
	JnJn							1
		Climatic variables
		Country-wide							Region Center							Region East							Region West
		DNTmarch	DNTapril	DNTmay	DNTjune	DNTautumn	DNTwinter	DNTspring	DNTmarch	DNTapril	DNTmay	DNTjune	DNTautumn	DNTwinter	DNTspring	DNTmarch	DNTapril	DNTmay	DNTjune	DNTautumn	DNTwinter	DNTspring	DNTmarch	DNTapril	DNTmay	DNTjune	DNTautumn	DNTwinter	DNTspring
Country-wide	DNTmarch	1	0.10	0.08	-0.35	0.38	0.21	-0.18	0.96	0.29	0.44	-0.60	0.61	-0.09	-0.65	0.90	0.08	0.05	-0.11	0.34	-0.37	-0.04	0.88	-0.03	-0.20	-0.37	0.09	0.12	-0.21
	DNTapril		1	0.70	-0.29	0.87	0.76	0.54	0.18	0.90	0.52	-0.18	0.64	0.02	-0.67	0.02	0.96	0.57	-0.38	0.80	0.62	0.17	0.13	0.98	0.80	0.31	0.93	0.60	-0.20
	DNTmay			1	0.01	0.90	0.52	0.78	0.24	0.80	0.85	0.08	0.78	0.06	-0.35	-0.05	0.53	0.96	-0.08	0.87	0.66	0.44	0.09	0.69	0.90	0.29	0.84	0.87	-0.25
	DNTjune				1	-0.22	-0.27	0.52	-0.36	-0.12	0.20	0.74	-0.05	-0.10	0.23	-0.41	-0.49	0.03	0.83	-0.31	-0.24	-0.20	-0.18	-0.23	-0.15	0.70	-0.23	-0.42	-0.50
	DNTautumn					1	0.69	0.63	0.49	0.93	0.84	-0.21	0.90	0.01	-0.68	0.24	0.75	0.81	-0.24	0.94	0.54	0.31	0.36	0.82	0.81	0.20	0.91	0.79	-0.29
	DNTwinter						1	0.40	0.18	0.54	0.46	0.04	0.48	-0.09	-0.67	-0.03	0.74	0.35	-0.04	0.55	0.22	0.29	0.42	0.79	0.62	0.01	0.81	0.43	-0.22
	DNTspring							1	-0.13	0.61	0.73	0.45	0.54	-0.23	-0.20	-0.35	0.29	0.71	0.39	0.51	0.35	0.32	0.01	0.62	0.71	0.76	0.68	0.41	-0.35
Region Center	DNTmarch								1	0.42	0.54	-0.63	0.73	0.12	-0.67	0.89	0.16	0.21	-0.21	0.48	-0.14	-0.10	0.77	0.02	-0.06	-0.37	0.16	0.29	-0.30
	DNTapril									1	0.75	-0.23	0.87	0.11	-0.71	0.24	0.79	0.72	-0.29	0.89	0.60	0.06	0.21	0.82	0.72	0.38	0.83	0.63	-0.41
	DNTmay										1	0.00	0.94	0.07	-0.58	0.21	0.31	0.77	0.23	0.72	0.27	0.15	0.47	0.48	0.59	0.28	0.66	0.59	-0.58
	DNTjune											1	-0.27	-0.19	0.40	-0.62	-0.28	0.14	0.61	-0.21	-0.04	0.24	-0.42	-0.05	0.08	0.49	-0.08	-0.19	-0.17
	DNTautumn												1	0.11	-0.75	0.46	0.49	0.71	-0.06	0.83	0.31	0.07	0.54	0.54	0.53	0.17	0.68	0.61	-0.53
	DNTwinter													1	-0.15	-0.12	0.09	0.01	-0.16	0.01	0.47	-0.63	-0.24	-0.11	0.06	-0.36	-0.08	0.12	-0.50
	DNTspring														1	-0.48	-0.64	-0.18	0.09	-0.53	-0.05	0.27	-0.68	-0.56	-0.25	-0.02	-0.57	-0.19	0.59
Region East	DNTmarch															1	0.06	0.01	-0.35	0.33	-0.29	-0.04	0.63	-0.12	-0.32	-0.33	-0.08	0.06	-0.03
	DNTapril																1	0.42	-0.56	0.73	0.62	0.13	0.07	0.92	0.70	0.11	0.84	0.55	-0.08
	DNTmay																	1	-0.15	0.87	0.67	0.54	-0.05	0.57	0.82	0.28	0.70	0.87	-0.13
	DNTjune																		1	-0.45	-0.53	-0.16	0.21	-0.30	-0.22	0.37	-0.21	-0.46	-0.48
	DNTautumn																			1	0.64	0.41	0.19	0.74	0.76	0.14	0.81	0.85	-0.13
	DNTwinter																				1	0.15	-0.53	0.59	0.79	0.12	0.58	0.74	-0.03
	DNTspring																					1	-0.01	0.29	0.46	0.01	0.38	0.57	0.61
Region West	DNTmarch																						1	0.08	-0.12	-0.24	0.21	0.01	-0.27
	DNTapril																							1	0.84	0.39	0.95	0.58	-0.11
	DNTmay																								1	0.27	0.91	0.84	-0.04
	DNTjune																									1	0.28	-0.11	-0.27
	DNTautumn																										1	0.74	-0.14
	DNTwinter																											1	0.13
	DNTspring																												1
	TEMPORAL APPROACH - 1999-2016
		ApSe	JnDe	JlDe	JnJn	DNTmarch	DNTapril	DNTmay	DNTjune	DNTautumn	DNTwinter	DNTspring
	ApSe	1	0.97	0.92	0.54	-0.51	-0.38	-0.50	-0.19	-0.68	-0.46	-0.33
	JnDe		1	0.85	0.69	-0.44	-0.33	-0.45	-0.27	-0.59	-0.53	-0.37
	JlDe			1	0.21	-0.54	-0.45	-0.48	-0.18	-0.70	-0.25	-0.27
	JnJn				1	-0.07	0.01	-0.17	-0.25	-0.15	-0.65	-0.33
	DNTmarch					1	0.12	-0.06	-0.13	0.28	-0.03	0.00
	DNTapril						1	0.29	-0.32	0.66	0.30	0.44
	DNTmay							1	0.27	0.86	-0.06	0.09
	DNTjune								1	0.04	-0.20	0.23
	DNTautumn									1	0.06	0.25
	DNTwinter										1	0.21
	DNTspring											1
	SPATIO-TEMPORAL APPROACH
		DNTmarch	DNTapril	DNTmay	DNTautumn	DNTwinter	DNTspring	DenBra	DenBol	DenPar	Pop
	DNTmarch	1	0.81	0.76	0.88	0.84	0.61	-0.17	0.13	-0.11	0.50
	DNTapril		1	0.89	0.96	0.80	0.65	-0.12	0.19	0.05	0.53
	DNTmay			1	0.96	0.74	0.68	-0.19	0.08	-0.17	0.53
	DNTautumn				1	0.83	0.70	-0.17	0.14	-0.10	0.56
	DNTwinter					1	0.66	-0.01	0.01	-0.03	0.47
	DNTspring						1	0.02	-0.02	-0.06	0.73
	DenBra							1	-0.66	0.82	0.00
	DenBol								1	-0.38	0.00
	DenPar									1	0.00
	Pop										1
	SPATIAL APPROACH
		Tme_annual	Tme_autumn	Tmi_annual	Tmi_autumn	PP_annual	DE_annual	WI_annual	DPT2015-2016	DNT_may	DNT_autumn	Ar	Al	AlSd	DiWa	DiBol	DiNea	Pop2010	Prc
	Tme_annual	1	0.99	0.96	0.91	0.69	0.92	0.15	0.83	-0.92	-0.92	-0.39	-0.55	-0.38	0.10	-0.48	-0.76	0.07	-0.18
	Tme_autumn		1	0.99	0.96	0.76	0.93	0.09	0.85	-0.95	-0.93	-0.40	-0.52	-0.37	0.07	-0.51	-0.82	0.09	-0.19
	Tmi_annual			1	0.99	0.76	0.88	-0.02	0.88	-0.95	-0.93	-0.43	-0.45	-0.32	0.03	-0.58	-0.87	0.11	-0.19
	Tmi_autumn				1	0.80	0.85	-0.10	0.89	-0.94	-0.90	-0.41	-0.38	-0.28	0.00	-0.62	-0.91	0.11	-0.19
	PP_annual					1	0.82	0.12	0.63	-0.75	-0.72	-0.36	-0.54	-0.48	-0.08	-0.19	-0.72	0.14	0.00
	DE_annual						1	0.31	0.66	-0.88	-0.87	-0.38	-0.68	-0.51	0.09	-0.26	-0.67	0.12	-0.09
	WI_annual							1	-0.18	0.00	-0.03	0.11	-0.62	-0.45	0.11	0.65	0.37	0.05	-0.06
	DPT2015-2016								1	-0.82	-0.78	-0.31	-0.24	-0.16	-0.01	-0.63	-0.84	-0.01	-0.24
	DNT_may									1	0.99	0.47	0.45	0.33	-0.07	0.59	0.88	-0.09	0.12
	DNT_autumn										1	0.49	0.46	0.34	-0.08	0.57	0.85	-0.09	0.10
	Ar											1	0.14	0.14	0.11	0.32	0.45	-0.12	0.03
	Al												1	0.79	-0.23	-0.31	0.17	-0.12	0.00
	AlSd													1	-0.24	-0.25	0.18	-0.11	0.00
	DiWa														1	0.00	0.01	-0.11	-0.21
	DiBol															1	0.78	0.04	0.18
	DiNea																1	-0.05	0.17
	Pop2010																	1	0.12
	Prc																		1
