# Supplementary material for: Is autumn the key for dengue epidemics in non endemic regions? The case of Argentina
Source: PeerJ. 2018 Jul 17;6:e5196. doi: 10.7717/peerj.5196 (PMC6054063; doi:10.7717/peerj.5196)
Supplement: File S4 — For each explanatory variable, residual deviance of the model, AIC value and p-value of the c2 test between the univariate model and the null model is informed. * p < 0.05, ** p < 0.01 [file peerj-06-5196-s004.xlsx]

## Sheet: Hoja1
UNIVARIATE ANALYSES
	TEMPORAL APPROACH - 2009-2016						TEMPORAL APPROACH - 1999-2016				SPATIO-TEMPORAL APPROACH					SPATIAL APPROACH
											Epidemic > 20 cases
		Residual Deviance	AIC	p			Residual Deviance	AIC	p			Residual Deviance	AIC	p			Residual Deviance	AIC	p
	Null model	26690	36342			Null model	20741	56719			Null model	145.89	147.89			<none>	616.38	618.38
	DenBra	24274	37583			ApSe	18861	56839			DNTmarch	145.45	149.45			Tme_annual	489.96	493.96	***
	DenBol	22658	37032			JnDe	19429	57407			DNTapril	145.24	149.24			Tme_autumn	462.32	466.32	***
	DenPar	24261	37578			JlDe	17067	55045			DNTmay	141.36	145.36	*		Tmi_annual	447.36	451.36	***
	ApSe	17987	35185			JnJn	20461	58439			DNTautumn	143.79	147.79			Tmi_autumn	431.84	435.84	***
	JnDe	19871	35982			DNTmarch	20335	58313			DNTwinter	145.88	149.88			PP_annual	474.31	478.31	***
	JlDe	16023	34260	*		DNTapril	16534	54512	*		DNTspring	145.86	149.86			DE_annual	444.46	448.46	***
	JnJn	26583	38310			DNTmay	13990	51968	**		DenBra	142.57	146.57			WI_annual	614.34	618.34
Country-wide	DNTmarch	25041	37832			DNTjune	19922	57900			DenBol	135.91	139.91	**		DPT2015-2016	505.11	509.11	***
	DNTapril	25445	37960			DNTautumn	12669	50647	**		DenPar	139.75	143.75	*		DNT_may	464.75	468.75	***
	DNTmay	16254	34374	*		DNTwinter	19084	57062			Pop	145.88	149.88			DNT_autumn	479.66	483.66	***
	DNTjune	20363	36177			DNTspring	17771	55749								Ar	605.53	609.53	***
	DNTautumn	19507	35834													Al	575.00	579.00	***
	DNTwinter	26605	38316								Epidemic > 100 cases					AlSd	592.17	596.17	***
	DNTspring	16241	34368	*								Residual Deviance	AIC	p		DiWa	616.04	620.04
Region Center	DNTmarch	23257	37240								Null model	122.35	124.35			DiBol	576.99	580.99	***
	DNTapril	18774	35527								DNTmarch	120.90	124.90			DiNea	463.39	467.39	***
	DNTmay	11714	31754	*							DNTapril	121.18	125.18			Pop2010	497.09	501.09	***
	DNTjune	23724	37399								DNTmay	116.56	120.56	*		Prc	612.29	616.29	*
	DNTautumn	14389	33399	*							DNTautumn	119.06	123.06
	DNTwinter	26578	38308								DNTwinter	121.60	125.60
	DNTspring	25249	37898								DNTspring	122.33	126.33
Region East	DNTmarch	24804	37756								DenBra	121.06	125.06
	DNTapril	26685	38340								DenBol	112.61	116.61	**
	DNTmay	13044	32614	*							DenPar	119.59	123.59
	DNTjune	25149	37866								Pop	122.00	126.00
	DNTautumn	17808	35105
	DNTwinter	25784	38066
	DNTspring	25747	38054
Region West	DNTmarch	26327	38232
	DNTapril	25865	38091
	DNTmay	24647	37705
	DNTjune	20508	36234
	DNTautumn	24878	37779
	DNTwinter	23668	37380
	DNTspring	20359	36176
